# Supplementary material
Source: PubMed Central journal article supplement (PMC6426915)
Supplement: 12264_2018_321_MOESM1_ESM.pdf [file 12264_2018_321_MOESM1_ESM.pdf]

# NMDA Receptor Antagonist MK-801 Protects against 1-Bromopropane-Induced Cognitive Dysfunction

Lin Xu<sup>1</sup>, Xiaofei Qiu<sup>1</sup>, Shuo Wang<sup>3</sup>, Qingshan Wang<sup>2,\*</sup>, Xiu-Lan Zhao<sup>1,\*</sup>

<sup>1</sup>*School of Public Health, Shandong University, Jinan 250012, China*

<sup>2</sup>*School of Public Health, Dalian Medical University, Dalian 116044, China*

<sup>3</sup>*School of Pharmacy, Liaocheng University, Liaocheng 252000, China*

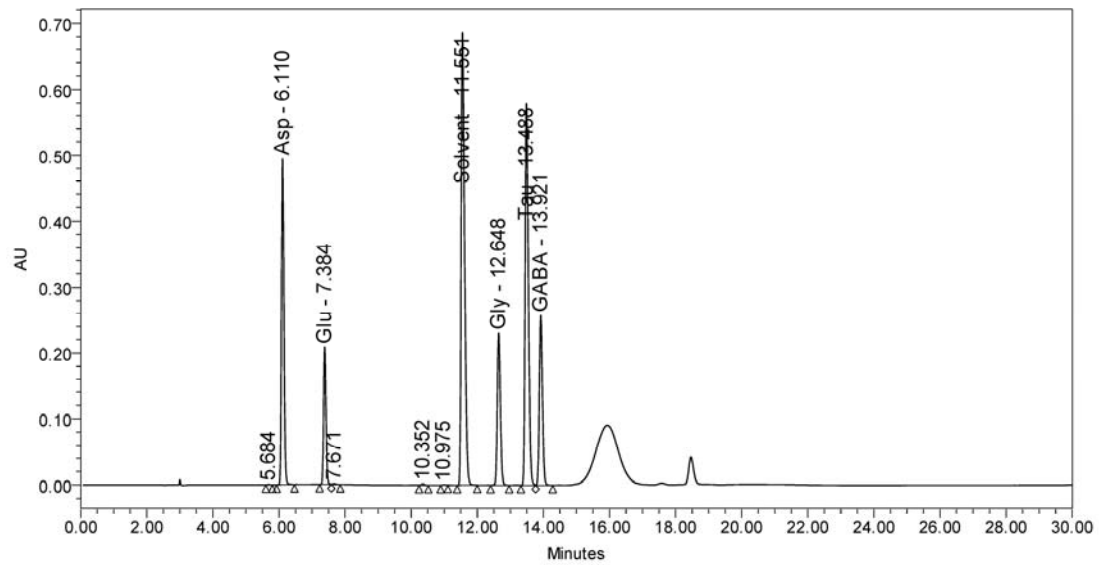

Fig. S1. HPLC chromatogram of standard mixed solution of five amino-acids.
